# Supplementary material for: α-Terpineol: An Aggregation Pheromone in Optatus palmaris (Coleoptera: Curculionidae) (Pascoe, 1889) Enhanced by Its Host-Plant Volatiles
Source: MDPI journal article supplement (doi:10.3390/molecules26102861), 2021-05-12
Supplement: s1 [file s1]

**Supplementary table 1.** GC-MS identification of soursop volatiles trapped by dynamic headspace and solid phase microextraction.

| Compound                         | Technique | Formula  | Score match (%) <sup>a</sup> | DB mass <sup>b</sup> | CAS <sup>c</sup> |
|----------------------------------|-----------|----------|------------------------------|----------------------|------------------|
| <i>β</i> -elemene                | SPME      | C15H24   | 76.30                        | 204.2                | 110823-68-2      |
| <i>cis</i> - <i>β</i> -farnesene | AD        | C15H24   | 77.51                        | 204.2                | 28973-97-9       |
| <i>trans</i> - <i>β</i> -ionone  | SPME      | C13H20O  | 77.51                        | 192.2                | 79-77-6          |
| benzophenone                     | AD/SPME   | C13H10O  | 79.57                        | 182.1                | 119-61-9         |
| Octanal                          | AD/SPME   | C8H16O   | 79.81                        | 128.1                | 124-13-0         |
| <i>β</i> -terpinene              | SPME      | C10H16   | 80.59                        | 136.1                | 99-84-3          |
| oxalic acid allyl nonyl ester    | AD        | C14H24O4 | 82.46                        | 256.2                | 1000309-23-7     |
| Decanal                          | AD/SPME   | C10H20O  | 83.51                        | 156.2                | 112-31-2         |
| ( <i>Z</i> )-2-Dodecenol         | AD/SPME   | C15H24   | 84.24                        | 204.2                | 5208-59-3        |
| (-)- <i>β</i> -bourbonene        | AD/SPME   | C15H24   | 84.24                        | 204.2                | 5208-59-3        |
| <i>β</i> -caryophyllene*         | AD/SPME   | C15H24   | 84.57                        | 204.2                | 118-65-0         |
| 2,5-hexanedione                  | AD/SPME   | C6H10O2  | 85.59                        | 114.1                | 110-13-4         |
| 2-hexenoic acid                  | AD/SPME   | C7H12O2  | 85.98                        | 128.1                | 2396-77-2        |
| D-limonene*                      | AD        | C10H16   | 86.15                        | 136.1                | 5989-54-8        |
| pentanedioic acid                | AD/SPME   | C7H12O4  | 86.16                        | 160.1                | 1119-40-0        |
| nonanal*                         | AD/SPME   | C9H18O   | 86.84                        | 142.1                | 124-19-6         |

\*Means that the compound was compared with a standard compound. <sup>a</sup> Match percentage between the mass spectra of the compound and the NIST library (V. 2014). <sup>b</sup> Represents the higher m/z values observed in the compound mass spectra. <sup>c</sup> Chemical abstracts service registry number.

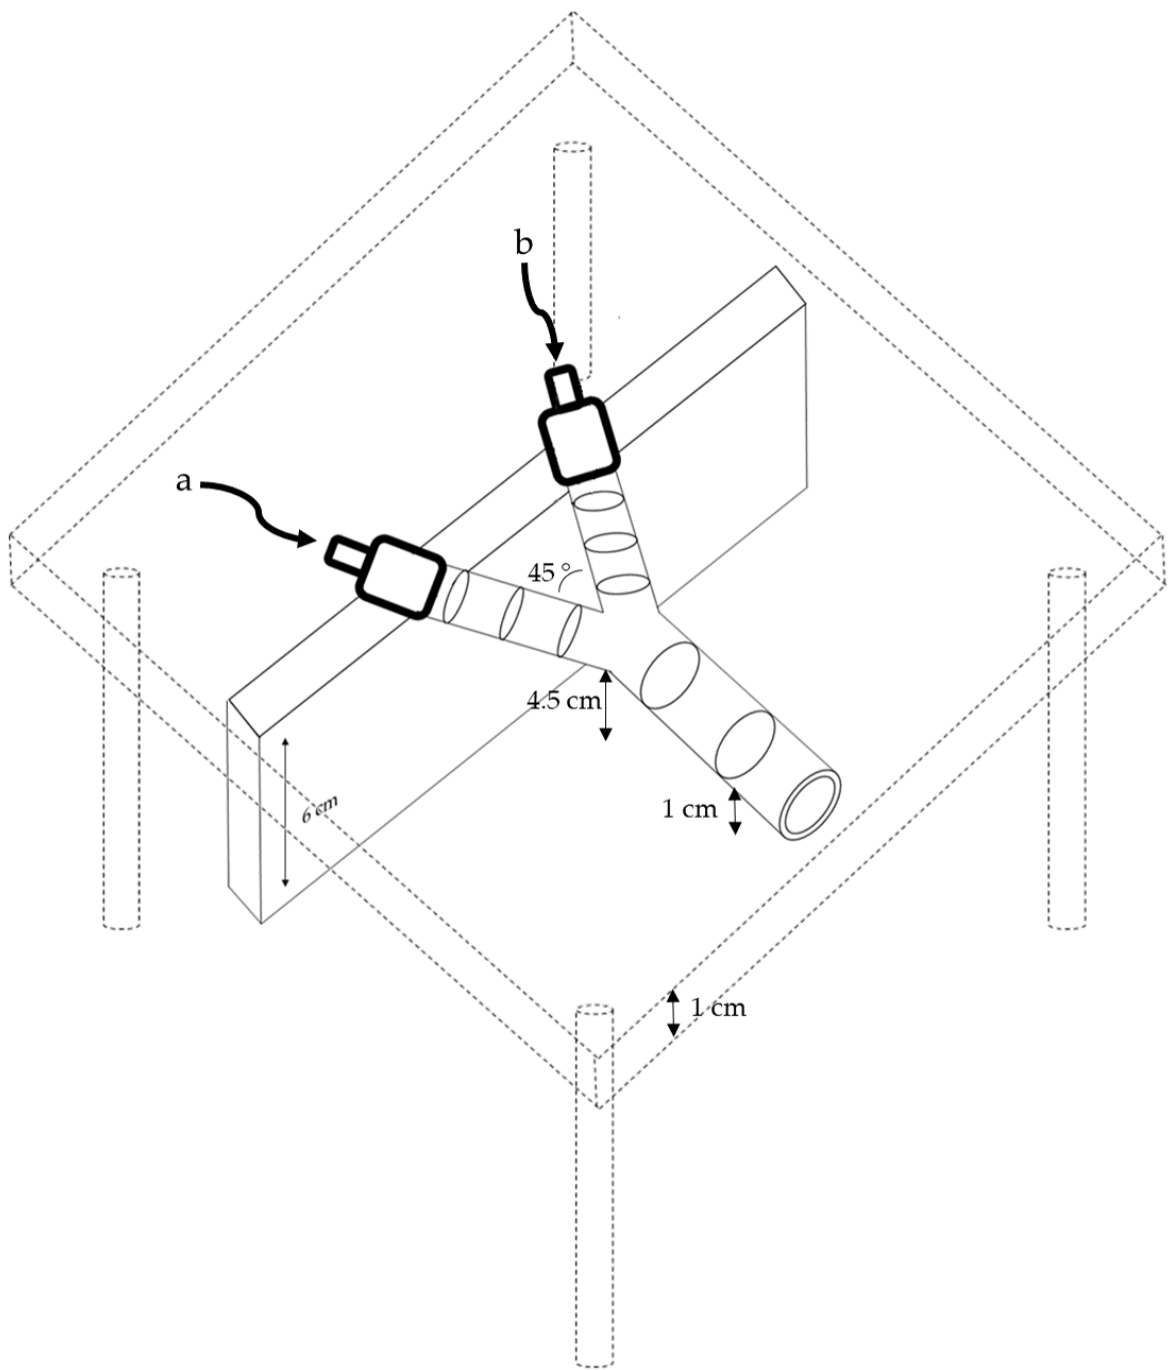

**Supplementary Figure S1.** Olfactometry system diagram. The olfactometer consisted of a Y-maze olfactometer with 45 ° of separation between the two flow arms. The olfactometer was placed on top of a 6 cm styrofoam bar to cause an inclination of the system. The height between the union point of the olfactometer arms and the working bench was 4.5 cm. The olfactometry system was placed under two with light bars. To avoid light reflections on the walls, the room was covered with black mate paper. To avoid light reflections on the glass olfactometer and homogenize the light dispersion over the olfactometer, a 1 cm thick styrofoam bar was placed over the system. **a** and **b** represent air flow input to the system. In one stimulus experiments, one of the arms supplies filtered air and the other one an odor stimulus. In two stimulus experiments, both arms supply odor stimulus.
